# Supplementary material
Source: Springer Nature journal article supplement (https://www.springermedizin.de/resource/supplementary/12916_2012_646_MOESM3_ESM.pdf/9598678)
Supplement: MOESM3 [file 9598678]

**719** citations identified in the NGC database  
**442** Cardiovascular Diseases  
**53** Lung Neoplasms  
**26** Prostatic Neoplasms  
**52** Breast Neoplasms  
**102** COPD within Respiratory Tract Diseases  
**44** Diabetes Mellitus, Type 2

**719** NGC website review

**636** Excluded

**472** Unrelated topic<sup>1</sup>  
**14** Not focused on adult  
**46** Not from US, Canada, or UK NICE  
**44** Not focused on treatments  
**60** Not using risk assessment tools

**83** Full text review

**66** Excluded

**9** Unrelated topic<sup>1</sup>  
**1** Not focused on treatments  
**49** Not using risk assessment tools  
**4** No link between risk tools and treatments  
**1** Electronic copies not available  
**2** Duplicates<sup>2</sup>

**3** Included (guidelines being referenced by others in the recommendations)

**20** Included (guidelines using risk assessment tools to inform risk-stratified treatment decisions)

**12** Cardiovascular disease and related conditions  
**1** Cardiovascular disease and type 2 diabetes  
**3** Type 2 diabetes  
**4** Breast cancer
